# Supplementary material for: Efficacy and oncologic safety of nerve-sparing radical hysterectomy for cervical cancer: a randomized controlled trial
Source: PubMed Central journal article supplement — J Gynecol Oncol. 2015 Apr 9;26(2):90–9. doi: 10.3802/jgo.2015.26.2.90 (PMC4397238; doi:10.3802/jgo.2015.26.2.90), 2015-04-09
Supplement: jgo-26-90-s001.pdf [file jgo-26-90-s001.pdf]

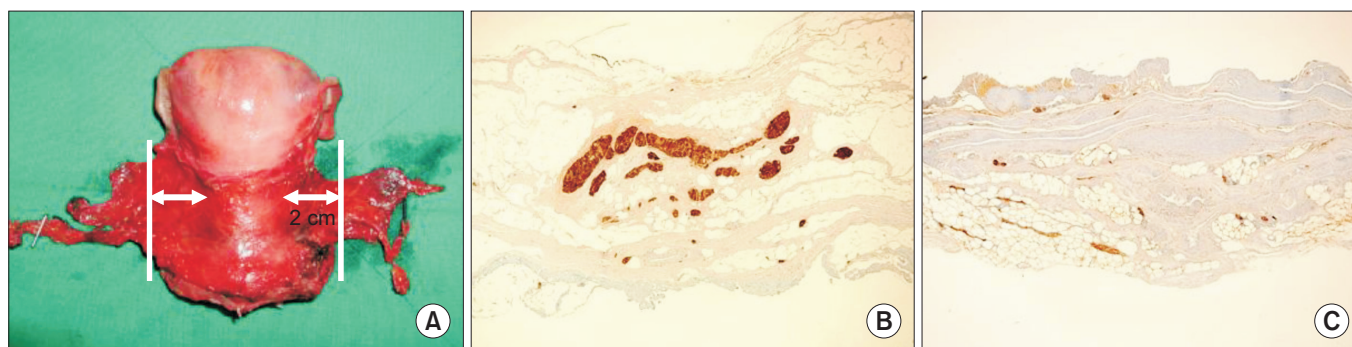

**Supplementary Fig. 1.** (A) Longitudinal section of the paracervical tissue at 2 cm apart from the isthmus was fixed for nerve staining. (B) Immunohistochemical staining with S-100 protein for quantification of nerve fibers after conventional radical hysterectomy, and (C) nerve-sparing radical hysterectomy ( $\times 40$ ).
