# Supplementary material for: Efficacy and oncologic safety of nerve-sparing radical hysterectomy for cervical cancer: a randomized controlled trial
Source: PubMed Central journal article supplement — J Gynecol Oncol. 2015 Apr 9;26(2):90–9. doi: 10.3802/jgo.2015.26.2.90 (PMC4397238; doi:10.3802/jgo.2015.26.2.90), 2015-04-09
Supplement: jgo-26-90-s002.pdf [file jgo-26-90-s002.pdf]

**Supplementary Table 1.** Summary of clinicopathologic characteristics of recurred cases

| Case no. | Group | Age (yr) | Pathology      | FIGO stage | Site of recurrence | Duration from surgery (mo) | Treatment modality for recurrence | Current status     |
|----------|-------|----------|----------------|------------|--------------------|----------------------------|-----------------------------------|--------------------|
| 1        | CRH   | 43       | Adenocarcinoma | IB1        | PALN               | 13                         | Laparoscopic operation→RT         | NED                |
| 2        | NSRH  | 45       | Adenocarcinoma | IB1        | Lung               | 90                         | Chemotherapy                      | NED                |
| 3        | CRH   | 51       | SCCA           | IB1        | Lung               | 15                         | Resection→chemotherapy            | NED                |
| 4        | NSRH  | 47       | SCCA           | IIA        | Lung, liver        | 19                         | Chemotherapy                      | DOD                |
| 5        | NSRH  | 47       | Adenocarcinoma | IB2        | Pelvis             | 38                         | Pelvic exenteration→RT            | Alive with disease |
|          |       |          |                |            | Lung               | 47                         | Resection→chemotherapy            |                    |

CRH, conventional radical hysterectomy; DOD, death of disease; FIGO, International Federation of Gynecology and Obstetrics; NED, no evidence of disease; NSRH, nerve-sparing radical hysterectomy; PALN, para-aortic lymph node; RT, radiotherapy; SCCA, squamous cell carcinoma.
